# Supplementary material for: Carbon black structural effect within kraft black liquor-based poly(HIPE): enhanced hydrogen storage and electro-capacitive properties
Source: Royal Society of Chemistry journal article supplement (doi:10.1039/d4ta02097a), 2024-01-01
Supplement: d4ta02097a1.pdf [file d4ta02097a1.pdf]

## *Supporting Information*

# Carbon Black Structural Effect within Kraft Black Liquors-based Poly(HIPE): Enhanced Hydrogen Storage and Electro-Capacitive Properties

*Romain Poupart<sup>1, 2, 3</sup>, Ronan Invernizzi<sup>2, 3</sup>, Hervé Deleuze<sup>1\*</sup>, Liliane Guerlou-Demourgues<sup>2, 4</sup>,  
Jacob Olchowka<sup>2, 4\*</sup>, L. David Talaga<sup>1</sup>, Laurent Servant<sup>1</sup>, Nicolas Penin<sup>2</sup>, Jean-Louis Bobet<sup>2</sup>  
and Rénal Backov<sup>3</sup>*

<sup>1</sup> Univ. Bordeaux, CNRS, Bordeaux INP, ISM, UMR 5255, F-33400 Talence, France

<sup>2</sup> Univ. Bordeaux, CNRS, Bordeaux INP, ICMCB, UMR 5026, F-33600 Pessac, France

<sup>3</sup> Univ. Bordeaux, CNRS, CRPP, UMR 5031, F-33600 Pessac, France

<sup>4</sup> RS2E, Réseau Français sur le Stockage Electrochimique de l'Energie, FR CNRS 3459,  
France

\*corresponding authors: [herve.deleuze@u-bordeaux.fr](mailto:herve.deleuze@u-bordeaux.fr) ; [jacob.olchowka@icmcb.cnrs.fr](mailto:jacob.olchowka@icmcb.cnrs.fr)

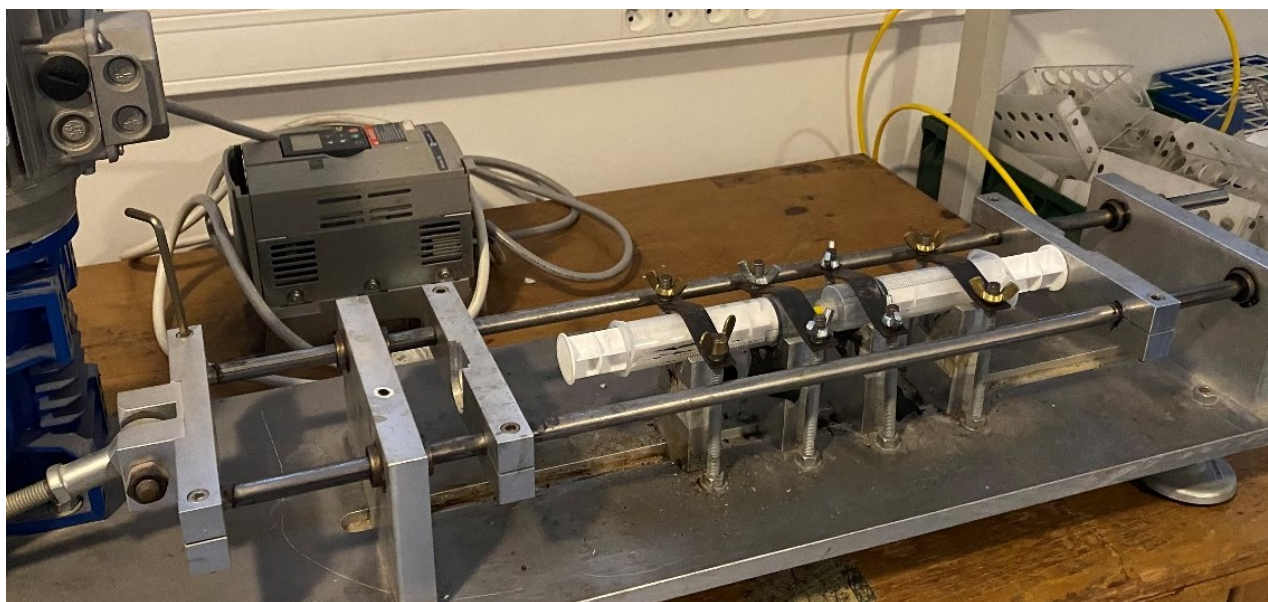

**Figure S1:** Photography of the home made double syringe pump used for emulsification. For size comparison, each syringe is about 14.5 cm length.

**Table S1:** Physical-Chemistry characteristics of the three carbon blacks in use

| Nomenclature | CB commercial reference | $\zeta$ Potential (mV) | Specific area ( $\text{m}^2\cdot\text{g}^{-1}$ ) |
|--------------|-------------------------|------------------------|--------------------------------------------------|
| CBA          | PBX55                   | -34.9                  | 75                                               |
| CBB          | Vulcan XC 72            | -9.6                   | 250                                              |
| CBC          | PBX51                   | -21.7                  | 1500                                             |

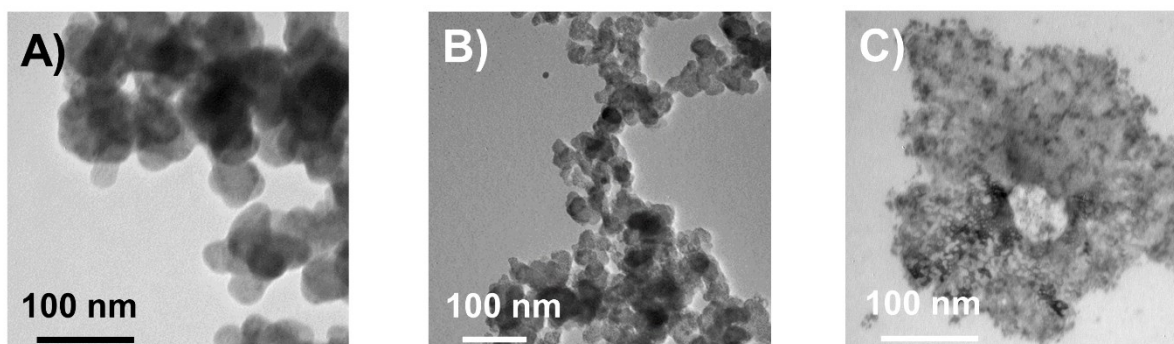

**Figure S2:** Transmission electron micrographs of the three different carbon black types used, with A) CBA; B) CBB and C) CBC. The CBA, CBB and CBC carbon black powers are exhibiting specific surface areas of 75; 250 and 1500  $\text{m}^2\cdot\text{g}^{-1}$ , respectively.

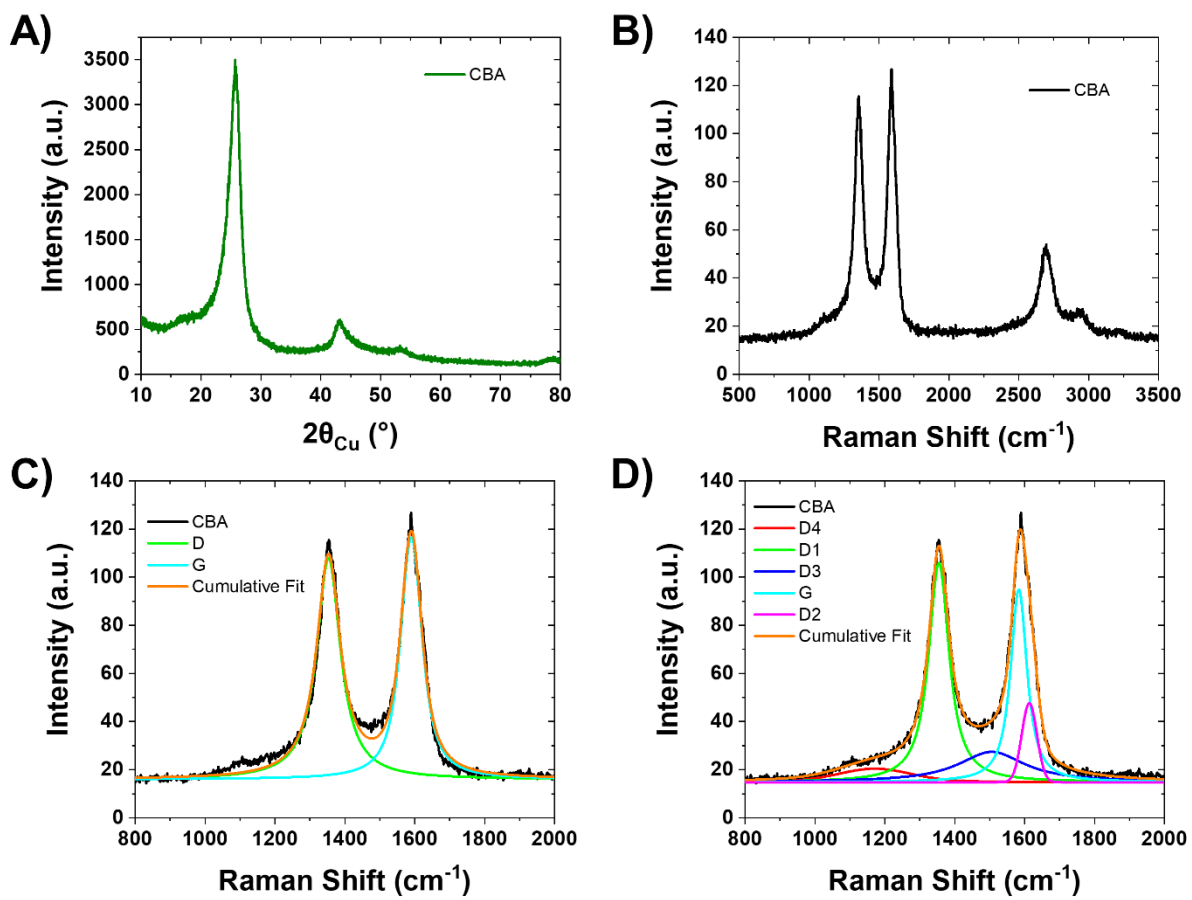

**Figure S3:** A) XRD diffractogram; B) Raman spectra with C) a 2-peaks fitting and D) a 5-peaks fitting of CBA.

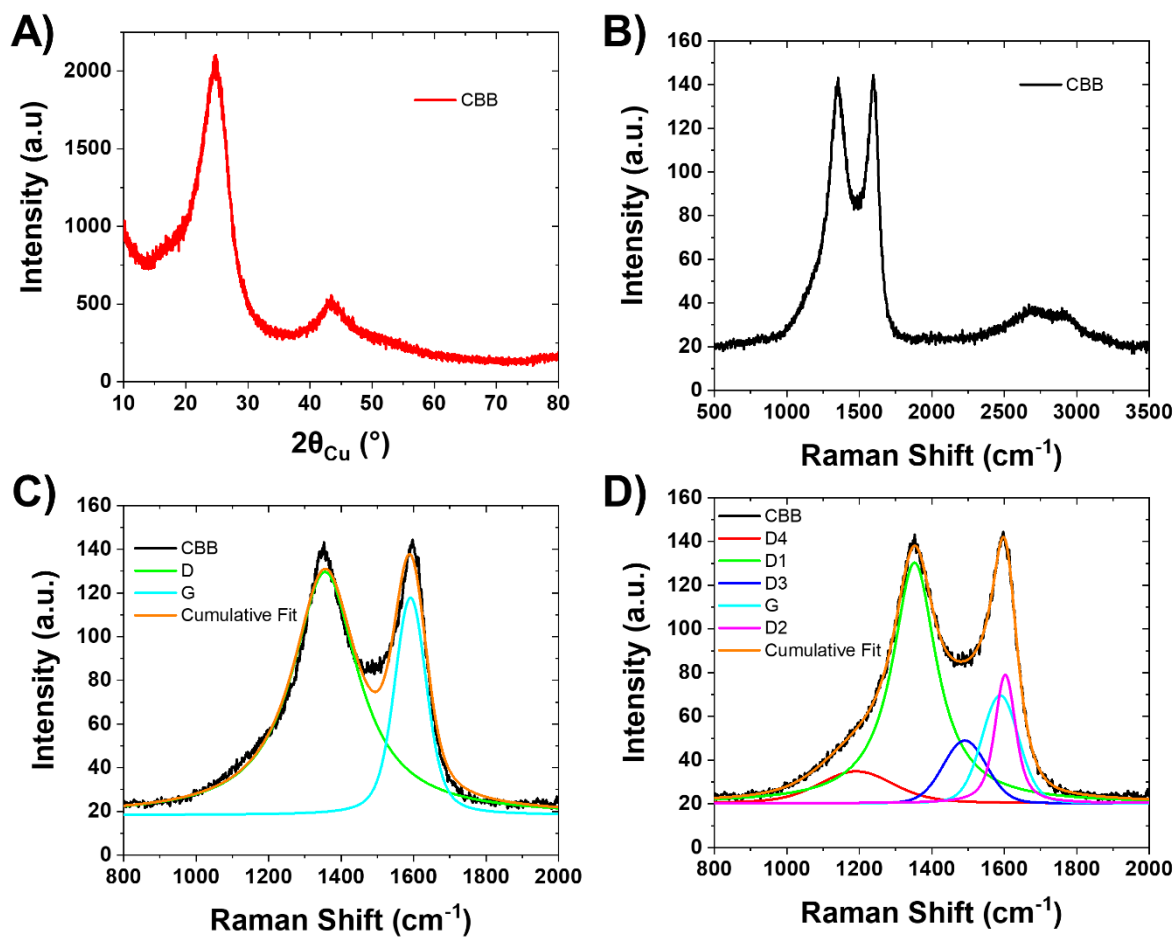

**Figure S4:** A) XRD diffractogram; B) Raman spectra with C) a 2-peaks fitting and D) a 5-peaks fitting of CBB.

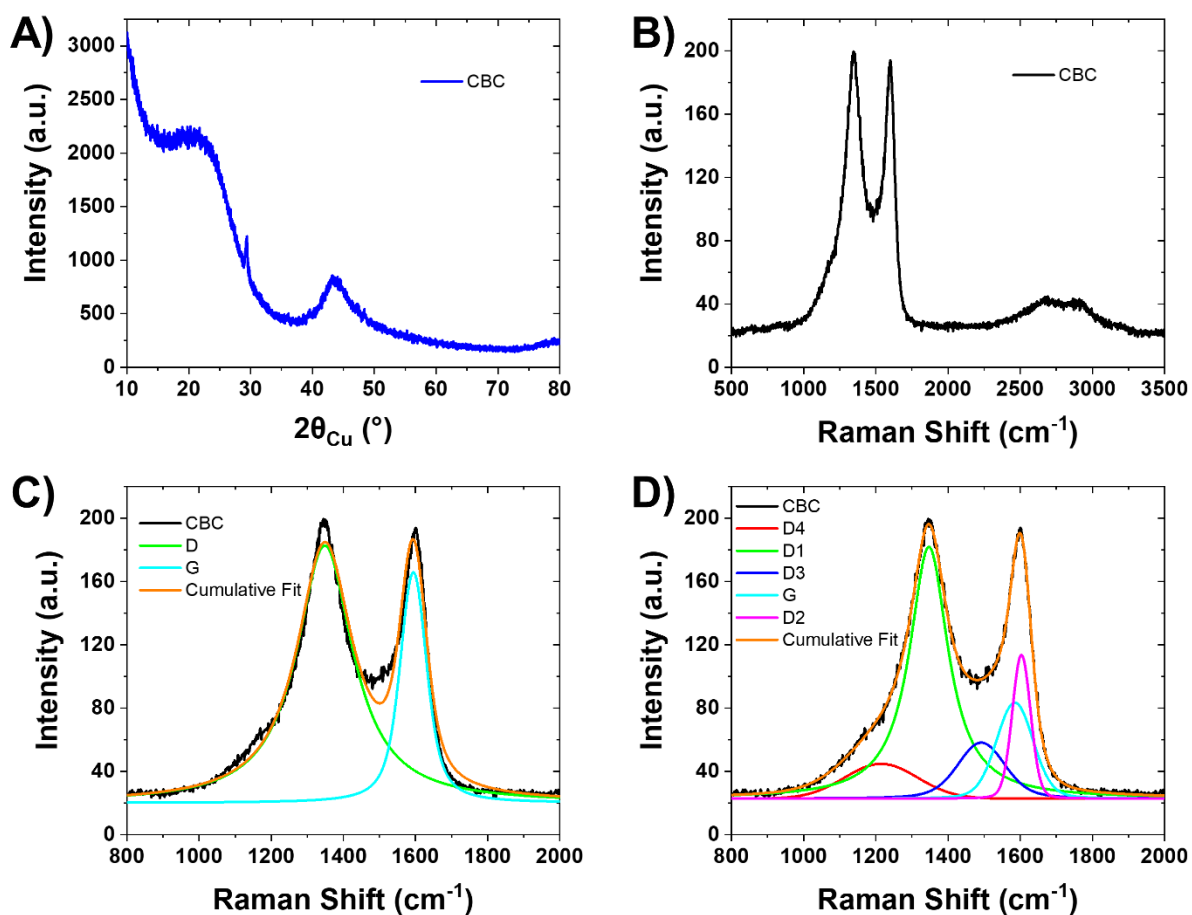

**Figure S5:** A) XRD diffractogram; B) Raman spectra with C) a 2-peaks fitting and D) a 5-peaks fitting of CBC.

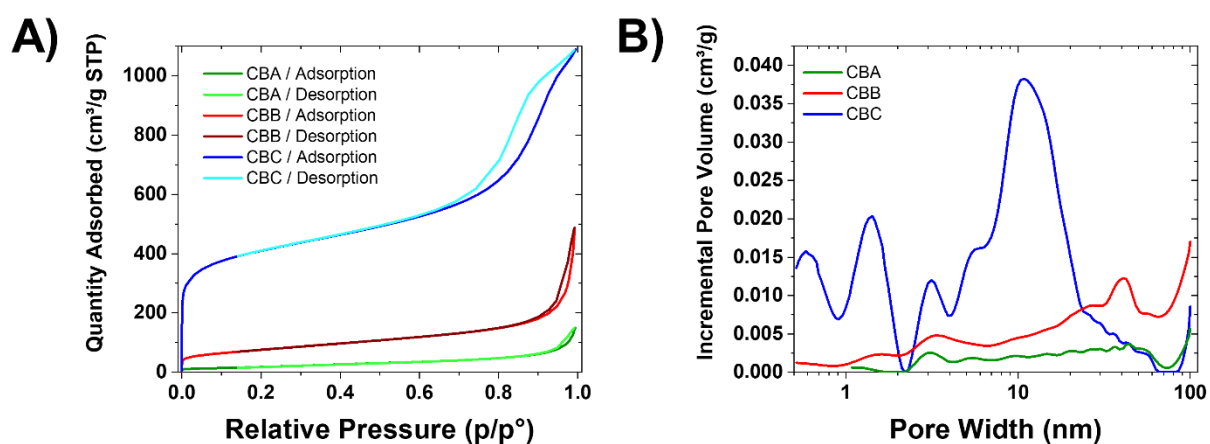

**Figure S6:** A) Nitrogen adsorption curves for the different pure carbon blacks as well as B) porosity obtained from NLDFT treatment of the nitrogen adsorption curves (NLDFT model from the Micromeritics software)

**Table S2:** Main data extracted from the mercury intrusion porosimetry of all the samples elaborated in this study. Namely porosity as well as skeletal and bulk densities.

|                                           | CBA – 0.5% | CBA – 1% | CBA – 3% | CBA – 5% |
|-------------------------------------------|------------|----------|----------|----------|
| Porosity (%)                              | 55         | 56       | 59       | 52       |
| Skeletal density<br>(g.mL <sup>-1</sup> ) | 1.46       | 1.48     | 1.39     | 1.35     |
| Bulk density<br>(g.mL <sup>-1</sup> )     | 0.66       | 0.65     | 0.57     | 0.65     |
|                                           | CBB – 0.5% | CBB – 1% | CBB – 3% | CBB – 5% |
| Porosity (%)                              | 56         | 61       | 64       | 63       |
| Skeletal density<br>(g.mL <sup>-1</sup> ) | 1.36       | 1.40     | 1.40     | 1.32     |
| Bulk density<br>(g.mL <sup>-1</sup> )     | 0.60       | 0.54     | 0.51     | 0.49     |
|                                           | CBC – 0.5% | CBC – 1% | CBC – 3% | CBC – 5% |
| Porosity (%)                              | 52         | 60       | 60       | 61       |
| Skeletal density<br>(g.mL <sup>-1</sup> ) | 1.40       | 1.36     | 1.29     | 1.44     |
| Bulk density<br>(g.mL <sup>-1</sup> )     | 0.67       | 0.55     | 0.52     | 0.56     |

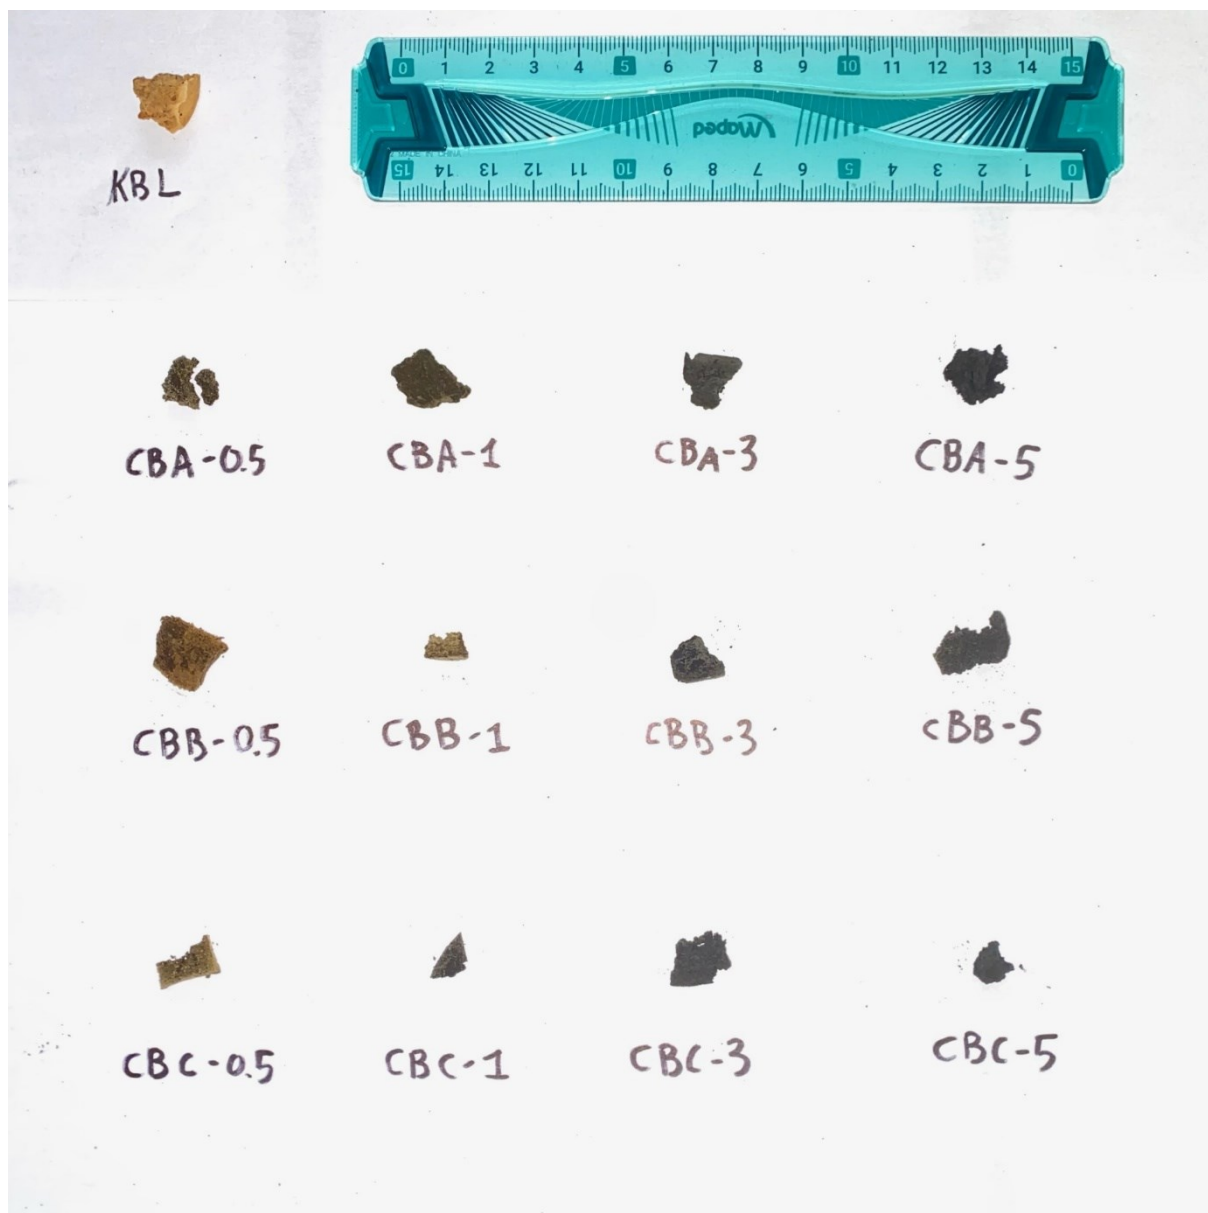

**Figure S7:** Photography of obtained monolith blocks of the different synthesized samples synthesized. The blocks presented here are cut from their respective samples after the drying step. Ruler in centimetre for scale.

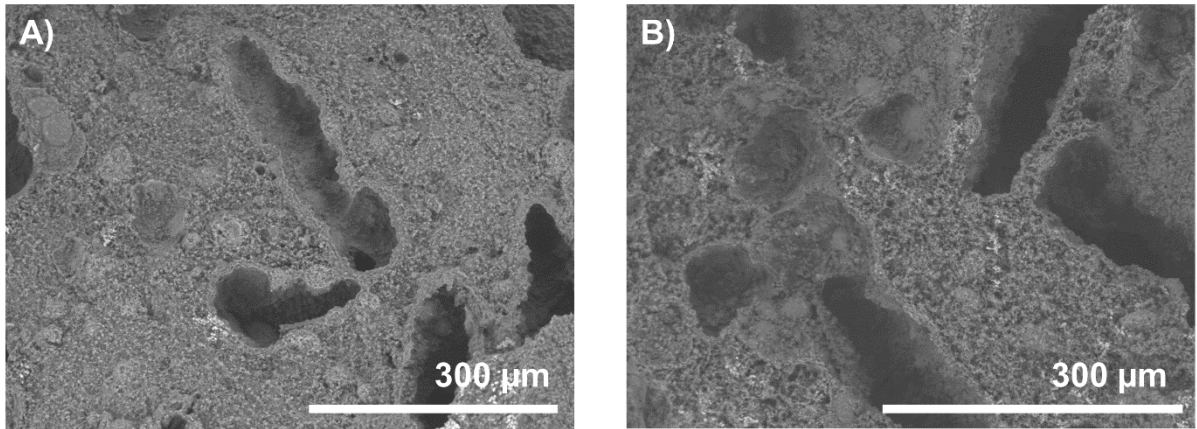

**Figure S8:** SEM pictures of A) CBC-1 and B) CBB-5 depicting emulsion dephasing steps.



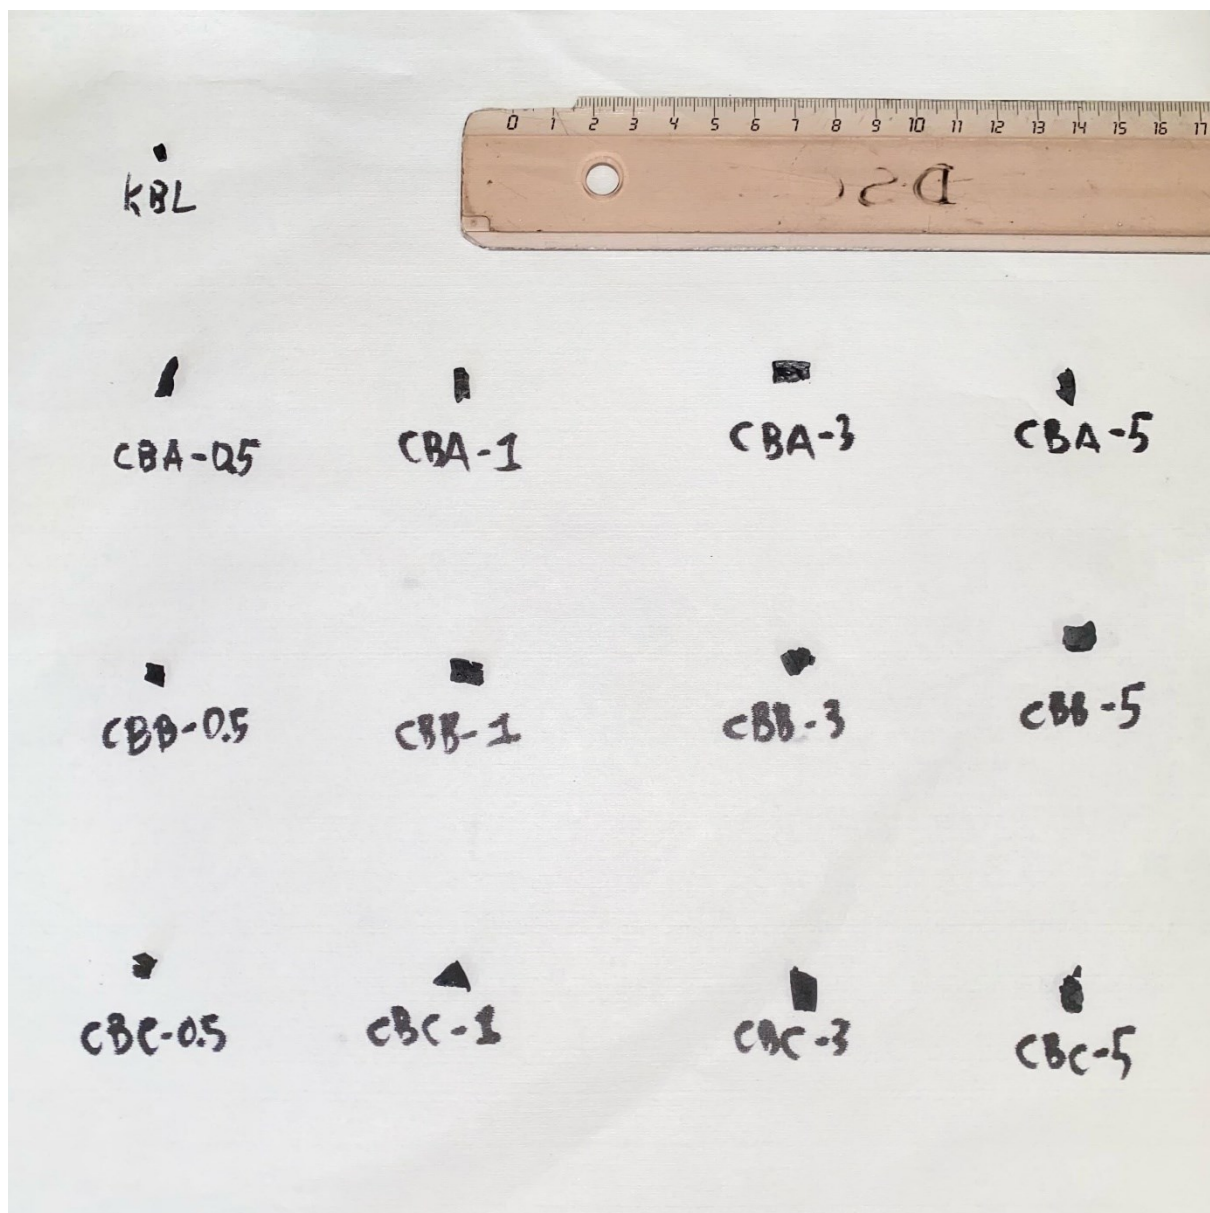

**Figure S9:** Photography of obtained carboHIPE blocks of the different synthesized samples. The samples presented here are obtained after carbonization step. Ruler in centimetre for scale.

**Table S3:** R1 and R2 parameters obtained through the 2-parameters fitting of the Raman spectra of each samples

| Parameter | KBLc | Pure CBA | CBA – 0.5% | CBA – 1% | CBA – 3% | CBA – 5% |
|-----------|------|----------|------------|----------|----------|----------|
| R1        | 4.19 | 1.12     | 3.37       | 2.90     | 3.81     | 3.77     |
| R2        | 0.81 | 0.53     | 0.76       | 0.74     | 0.79     | 0.78     |

  

| Parameter | KBLc | Pure CBB | CBB – 0.5% | CBB – 1% | CBB – 3% | CBB – 5% |
|-----------|------|----------|------------|----------|----------|----------|
| R1        | 4.19 | 3.15     | 2.46       | 3.58     | 3.55     | 4.07     |
| R2        | 0.81 | 0.77     | 0.70       | 0.77     | 0.77     | 0.80     |

  

| Parameter | KBLc | Pure CBC | CBC – 0.5% | CBC – 1% | CBC – 3% | CBC – 5% |
|-----------|------|----------|------------|----------|----------|----------|
| R1        | 4.19 | 2.83     | 2.63       | 2.90     | 3.53     | 4.04     |
| R2        | 0.81 | 0.74     | 0.72       | 0.73     | 0.78     | 0.80     |

**Table S4:**  $I_{Dx}/I_G$  and  $I_G/I_{all}$  ratios as given by the 5-peaks fitting of the different Raman spectra

| Parameter     | KBLc | Pure CBA | CBA – 0.5% | CBA – 1% | CBA – 3% | CBA – 5% |
|---------------|------|----------|------------|----------|----------|----------|
| $I_{D1}/I_G$  | 4.14 | 1.39     | 2.60       | 2.86     | 3.29     | 3.62     |
| $I_{D2}/I_G$  | 0.67 | 0.29     | 0.62       | 0.52     | 0.69     | 0.53     |
| $I_{D3}/I_G$  | 0.65 | 0.67     | 0.35       | 0.33     | 0.40     | 0.51     |
| $I_{D4}/I_G$  | 0.54 | 0.34     | 0.48       | 0.40     | 0.61     | 0.59     |
| $I_G/I_{all}$ | 0.14 | 0.27     | 0.21       | 0.21     | 0.17     | 0.17     |

  

| Parameter     | KBLc | Pure CBB | CBB – 0.5% | CBB – 1% | CBB – 3% | CBB – 5% |
|---------------|------|----------|------------|----------|----------|----------|
| $I_{D1}/I_G$  | 4.14 | 3.59     | 2.97       | 2.92     | 3.57     | 3.79     |
| $I_{D2}/I_G$  | 0.67 | 0.77     | 0.56       | 0.50     | 0.60     | 0.62     |
| $I_{D3}/I_G$  | 0.65 | 0.54     | 0.37       | 0.39     | 0.55     | 0.46     |
| $I_{D4}/I_G$  | 0.54 | 0.61     | 0.33       | 0.58     | 0.77     | 0.46     |
| $I_G/I_{all}$ | 0.14 | 0.15     | 0.20       | 0.20     | 0.16     | 0.16     |

  

| Parameter     | KBLc | Pure CBC | CBC – 0.5% | CBC – 1% | CBC – 3% | CBC – 5% |
|---------------|------|----------|------------|----------|----------|----------|
| $I_{D1}/I_G$  | 4.14 | 3.59     | 2.25       | 2.82     | 3.50     | 3.84     |
| $I_{D2}/I_G$  | 0.67 | 0.71     | 0.74       | 0.71     | 0.68     | 0.66     |
| $I_{D3}/I_G$  | 0.65 | 0.68     | 0.38       | 1.04     | 0.32     | 0.75     |
| $I_{D4}/I_G$  | 0.54 | 0.76     | 0.70       | 0.72     | 0.42     | 0.59     |
| $I_G/I_{all}$ | 0.14 | 0.15     | 0.20       | 0.16     | 0.17     | 0.15     |

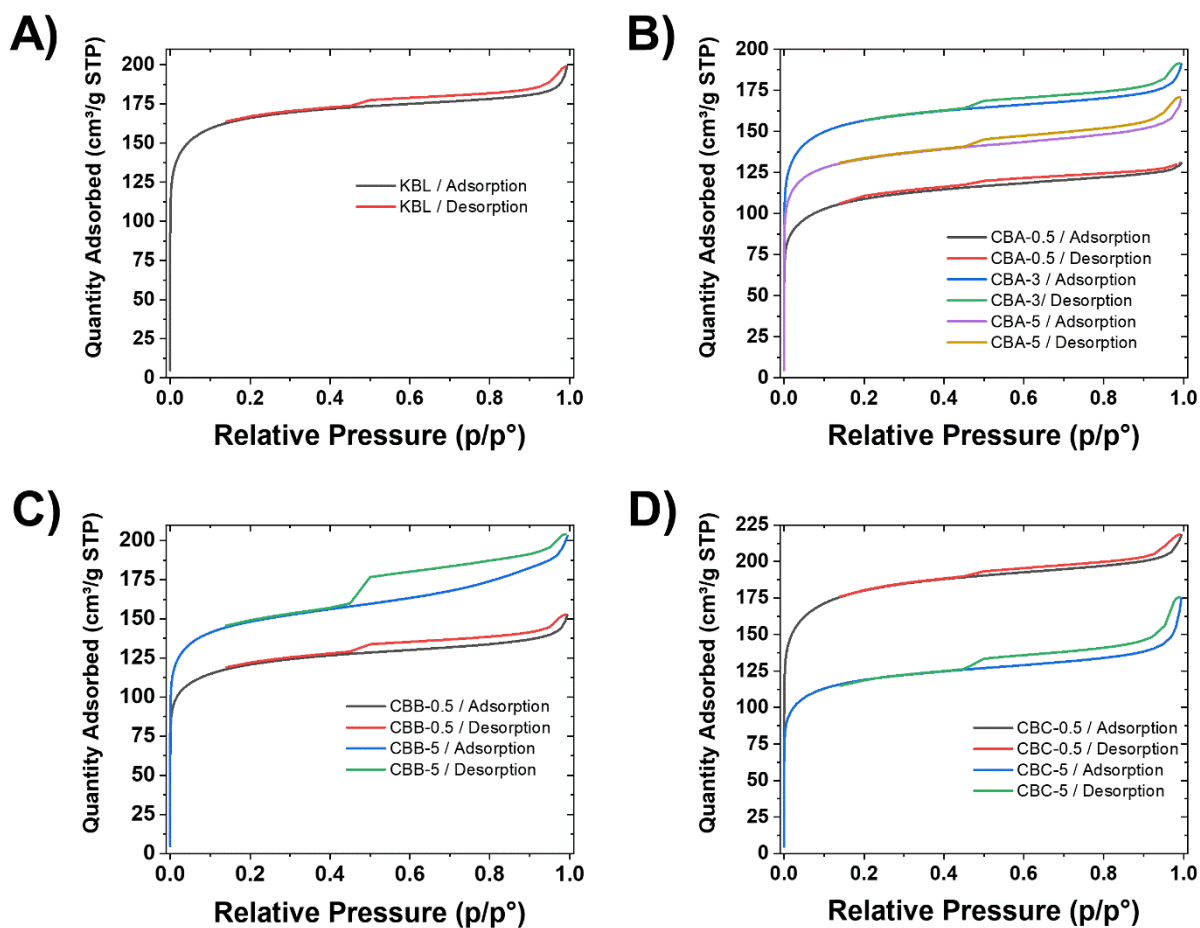

**Figure S10:** Nitrogen Adsorption curves for A) the KBLc monolith sample, B) the CBA-loaded samples, C) CBB-loaded samples and D) CBC-loaded samples.

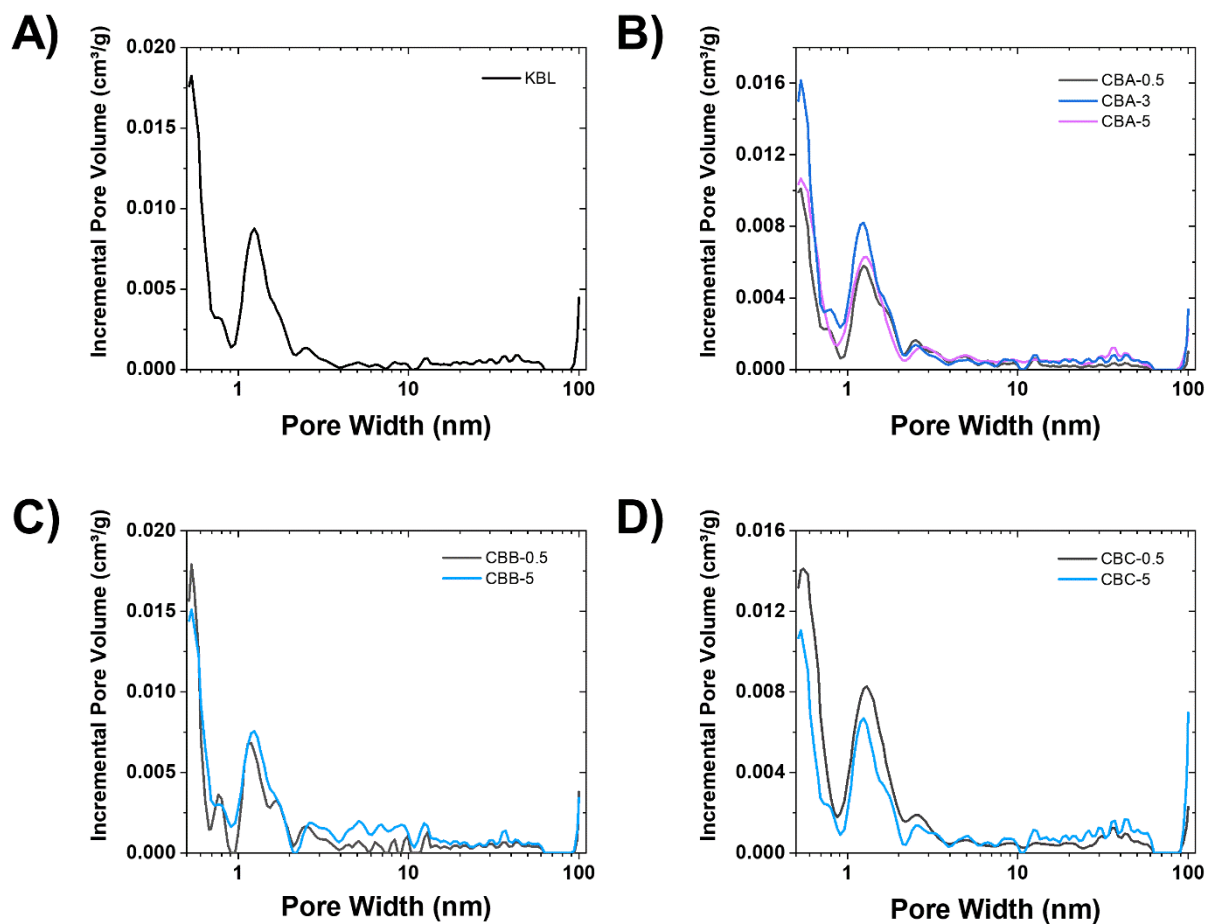

**Figure S11:** Porosimetry curves obtained from the NLDFT treatment of the nitrogen adsorption curves for A) the KBLc monolith sample, B) the CBA-loaded samples, C) CBB-loaded samples and D) CBC-loaded samples. NLDFT model from the Micromeritics software.
